# Supplementary material for: Aqueous phase reforming of ethylene glycol on Pt/CeO2–ZrO2: effects of cerium to zirconium molar ratio
Source: Royal Society of Chemistry journal article supplement (doi:10.1039/c5ra07124k), 2015-01-01
Supplement: c5ra07124k1.pdf [file c5ra07124k1.pdf]

## Supplementary material

### **Aqueous phase reforming of ethylene glycol on Pt/CeO<sub>2</sub>-ZrO<sub>2</sub>: effects of cerium to zirconium molar ratio**

**Seongho Jeon<sup>a</sup>, Hyungwon Ham<sup>a</sup>, Young-Woong Suh<sup>b</sup>, Jong Wook Bae<sup>a,\*</sup>**

<sup>a</sup> School of Chemical Engineering, Sungkyunkwan University (SKKU), Suwon, Gyeonggi-do, 440-746, Republic of Korea

<sup>b</sup> Department of Chemical Engineering, Hanyang University, Seoul 133-791, Republic of Korea

Supplementary **Table S1** represents the catalytic activity on the Pt/CeO<sub>2</sub>-ZrO<sub>2</sub> catalysts with different amount of platinum from 0 to 9wt% on the CeO<sub>2</sub>-ZrO<sub>2</sub>(4) support.

Supplementary **Table S2** represents the crystallite sizes and peak positions of the most intensive peaks assigned to cubic-CeO<sub>2</sub> or tetragonal-ZrO<sub>2</sub> at  $2\theta = 29^\circ$  from XRD analysis.

Supplementary **Figure S1** represents the catalytic activity of the Pt/CeO<sub>2</sub>-ZrO<sub>2</sub> catalysts with time on stream (h), which contain different amounts of platinum form 0 to 9wt%.

Supplementary **Figure S2** represents the results of Raman shifts of the fresh Pt/CeO<sub>2</sub>-ZrO<sub>2</sub> catalysts.

Supplementary **Figure S3** represents the XPS spectra of Ce3d<sub>5/2</sub> on the fresh Pt/CeO<sub>2</sub>-ZrO<sub>2</sub> catalysts.

**Table S1.** Catalytic activity on the Pt/CeO<sub>2</sub>-ZrO<sub>2</sub> with different amounts of platinum

| Notation <sup>a</sup>                        | EG conversion to gas (mol %) | H <sub>2</sub> production rate (ml/g <sub>cat</sub> /min) | Selectivity (mol %) |     |                 |                  |
|----------------------------------------------|------------------------------|-----------------------------------------------------------|---------------------|-----|-----------------|------------------|
|                                              |                              |                                                           | H <sub>2</sub>      | CO  | CO <sub>2</sub> | HCS <sup>b</sup> |
| Pt(3)/CeO <sub>2</sub> -ZrO <sub>2</sub> (4) | 20.4                         | 12.9                                                      | 72.5                | 2.0 | 24.8            | 0.7              |
| Pt(5)/CeO <sub>2</sub> -ZrO <sub>2</sub> (4) | 43.3                         | 30.0                                                      | 74.3                | 0.0 | 25.0            | 0.7              |
| Pt(9)/CeO <sub>2</sub> -ZrO <sub>2</sub> (4) | 43.1                         | 27.6                                                      | 72.6                | 0.6 | 26.2            | 0.6              |

<sup>a</sup>Different amounts of platinum were impregnated on CeO<sub>2</sub>-ZrO<sub>2</sub>(4) support, and 0 – 9wt%Pt loaded Pt/CeO<sub>2</sub>-ZrO<sub>2</sub> catalysts were tested at the same reaction conditions of T = 250 °C and P = 4.5 MPa.

<sup>b</sup>HCS represents the formed hydrocarbons, which are mainly C<sub>1</sub>-C<sub>3</sub> linear paraffin species.

**Table S2.** The crystallite sizes and peak positions of the most intensive peaks assigned to cubic-CeO<sub>2</sub> or tetragonal-ZrO<sub>2</sub> at 2θ = 29° from XRD analysis

| Notation                                  | Crystallite size of CeO <sub>2</sub> or ZrO <sub>2</sub> (nm) |                | Diffraction peak positions (2θ) of tetragonal ZrO <sub>2</sub> |                |                        |
|-------------------------------------------|---------------------------------------------------------------|----------------|----------------------------------------------------------------|----------------|------------------------|
|                                           | Before reaction                                               | After reaction | Before reaction                                                | After reaction | Shift (after – before) |
| Pt/ZrO <sub>2</sub>                       | 14.4                                                          | 26.6           | 30.18                                                          | 30.26          | 0.08                   |
| Pt/CeO <sub>2</sub> -ZrO <sub>2</sub> (3) | 8.1                                                           | 9.0            | 29.83                                                          | 29.91          | 0.08                   |
| Pt/CeO <sub>2</sub> -ZrO <sub>2</sub> (4) | 6.2                                                           | 6.7            | 29.36                                                          | 29.39          | 0.03                   |
| Pt/CeO <sub>2</sub> -ZrO <sub>2</sub> (6) | 6.3                                                           | 6.7            | 28.94                                                          | 29.02          | 0.08                   |
| Pt/CeO <sub>2</sub>                       | 13.0                                                          | 17.4           | 28.49                                                          | 28.53          | 0.04                   |

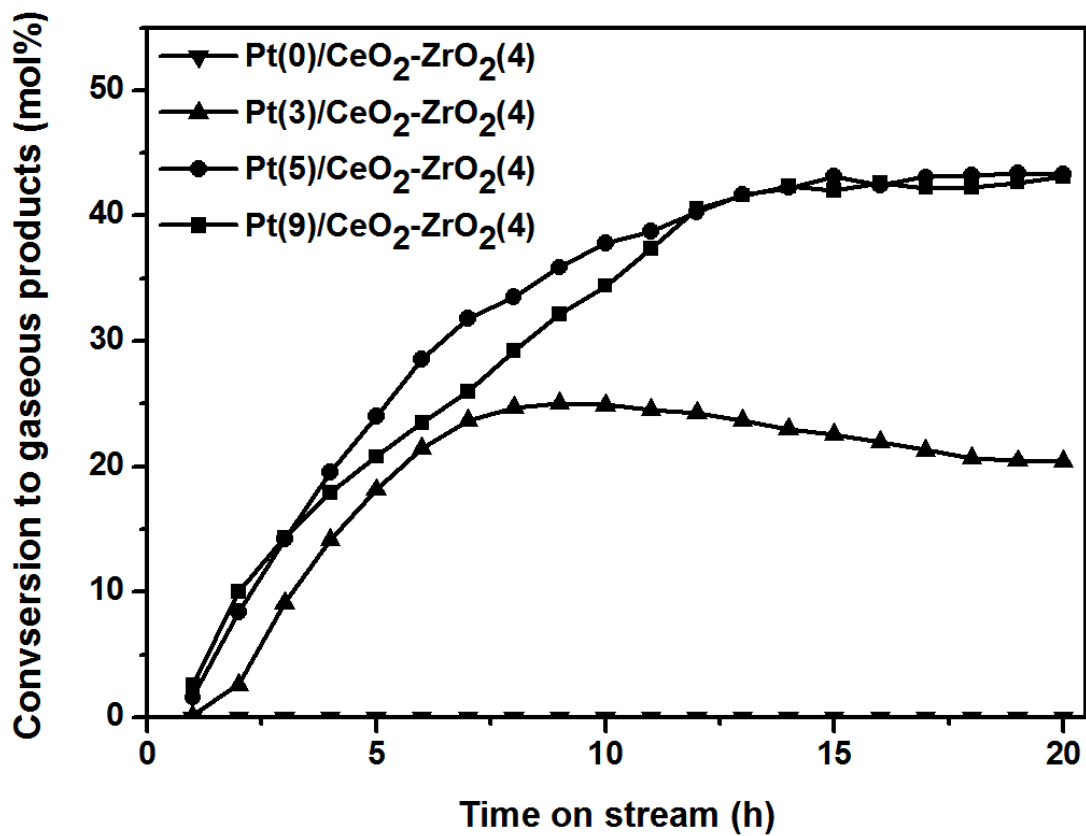

Figure S1. Catalytic activity of the Pt/CeO<sub>2</sub>-ZrO<sub>2</sub> catalysts with time on stream (h), which contain different amounts of platinum from 0 to 9wt%

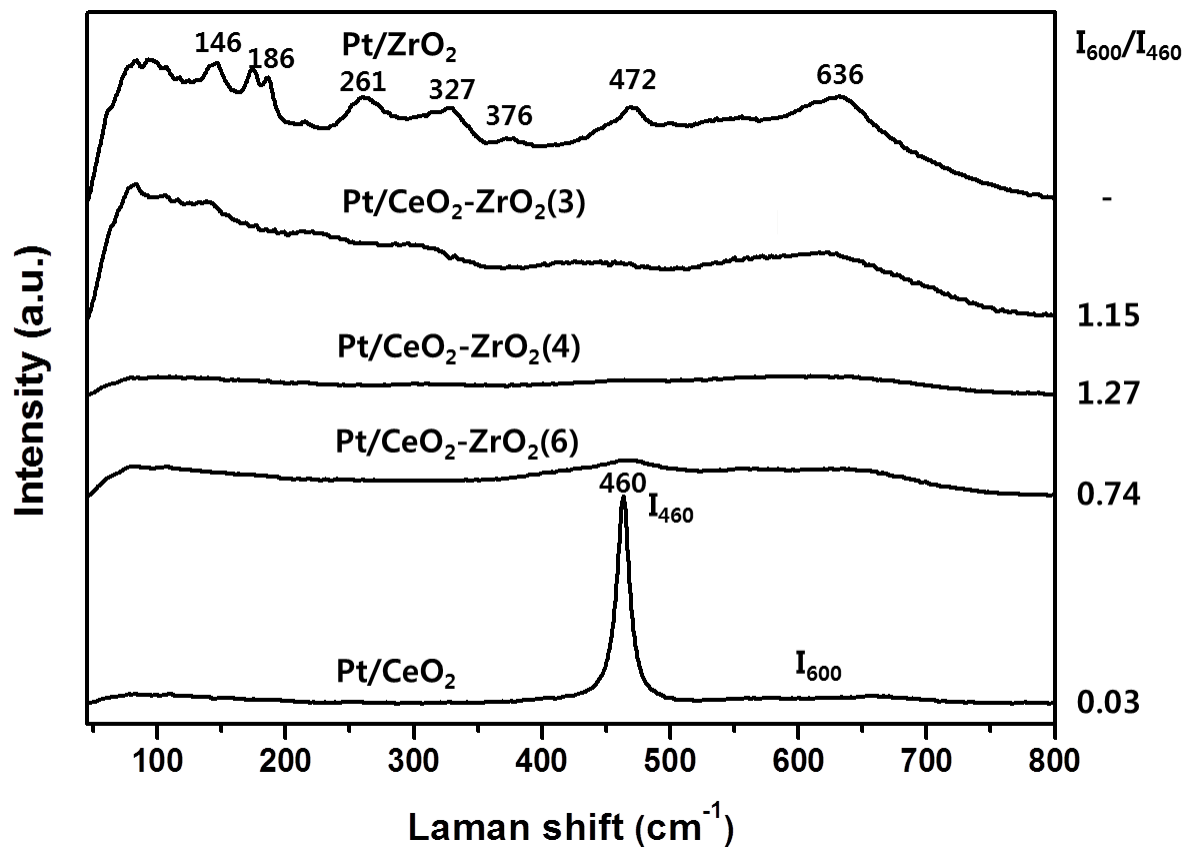

**Figure S2.** Results of Raman shifts of the fresh Pt/CeO<sub>2</sub>-ZrO<sub>2</sub> catalysts

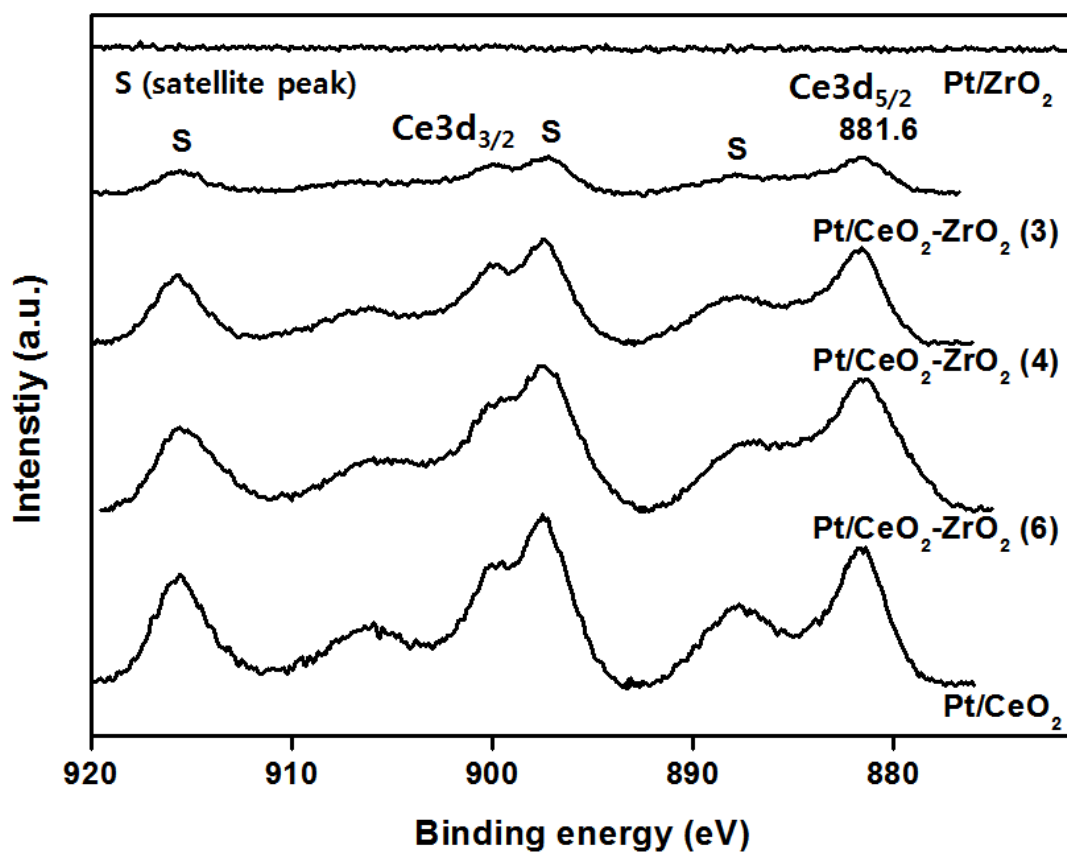

Figure S3. XPS spectra of Ce $3d_{5/2}$  on the fresh Pt/CeO<sub>2</sub>-ZrO<sub>2</sub> catalysts
